# Supplementary material for: Paramagnetic relaxation enhancement for the characterization of the conformational heterogeneity in two-domain proteins
Source: Royal Society of Chemistry journal article supplement (doi:10.1039/c2cp40139h), 2012-01-01
Supplement: c2cp40139h.pdf [file c2cp40139h.pdf]

## **Paramagnetic relaxation enhancements for the characterization of the conformational heterogeneity in two-domain proteins**

**Ivano Bertini,<sup>\*a,b</sup> Claudio Luchinat,<sup>\*a,b</sup> Malini Nagulapalli,<sup>a</sup> Giacomo Parigi,<sup>a,b</sup> Enrico Ravera<sup>a,b</sup>**

<sup>a</sup> *Magnetic Resonance Center (CERM), University of Florence, Via L. Sacconi 6, 50019 Sesto*

*Fiorentino (FI), Italy. Fax: +39 055 4574271; Tel: +39 055 4574270; E-mail:*

*ivanobertini@cerm.unifi.it; luchinat@cerm.unifi.it*

<sup>b</sup> *Department of Chemistry, University of Florence, Via della Lastruccia 5, 50019 Sesto Fiorentino (FI), Italy.*

PRE-derived MO in the slow exchange limit

In the unrealistic assumption that the exchange rate among the different conformations of the protein is slower than its tumbling rate,

$$R_{2j}^{PRE} = pR_{2j}^{sel} + \sum_i p_i R_{2ij} \quad (S1)$$

where  $R_{2j}^{PRE}$ ,  $R_{2j}^{sel}$  and  $R_{2ij}$  are the measured pre-PRE of the  $j$  residue, the pre-PRE calculated for a selected conformation and the pre-PRE calculated for the other  $i$  conformations sampled by the protein, respectively, and  $p$  and  $p_i$  indicate the corresponding weights.

If  $R_{2j}^{sel} > R_{2j}^{PRE}$  it can be immediately stated that the selected conformation cannot be the only one belonging to the structure ensemble (and thus  $p < 1$ ). Since the largest admissible value for  $p$  is in this case equal to  $R_{2j}^{PRE} / R_{2j}^{sel}$ , obtained when the  $R_{2ij}$  contributions to  $R_{2j}^{PRE}$  are negligible,<sup>1</sup> it is possible to define

$$MO_j = R_{2j}^{PRE} / R_{2j}^{sel} \text{ for } R_{2j}^{sel} > R_{2j}^{PRE} \quad (S2)$$

If  $R_{2j}^{sel} < R_{2j}^{PRE}$  the largest weight  $p$  of the selected conformation is achieved when the other conformations of the ensemble provide the largest possible pre-PRE, i.e.  $R_{2ij} = R_{2j}^{max}$ , so that  $\sum_i p_i = 1 - p$  can have the smallest value. In this case,

$$MO_j = \frac{R_{2j}^{PRE} - R_{2j}^{max}}{R_{2j}^{sel} - R_{2j}^{max}} \text{ for } R_{2j}^{sel} < R_{2j}^{PRE} \quad (S3)$$

$R_{2j}^{max}$  is the largest pre-PRE calculated for each residue taking into account all the conformations within the pool of 33,000 conformations covering the whole conformational space possibly sampled by the protein.<sup>2</sup> The MO of the conformation is then defined as the smallest  $MO_j$ , where  $j$  varies on all residues for which experimental PRE data are available.

It can be actually expected that in reality some conformations are sampled within the protein reorientation time and others in longer times. Therefore, some conformations can be representative for

sub-ensembles of conformations experienced in time smaller than the reorientation time of the protein; their relaxation rate must thus be calculated using an average correlation time which takes into account local mobility.

#### Reference List

- (1) A. N. Volkov, M. Ubbink and N. A. J. Van Nuland, *J.Biomol.NMR*, 2010, **48**, 225-236.
- (2) I. Bertini, A. Giachetti, C. Luchinat, G. Parigi, M. V. Petoukhov, R. Pierattelli, E. Ravera and D. I. Svergun, *J.Am.Chem.Soc.*, 2010, **132**, 13553-13558.

Table S1. Axial and rhombic anisotropies and Euler angles (in ZYZ convention) of the **pesPCS**-derived magnetic susceptibility tensors and of the **rdcRDC**-derived average tensors for the different lanthanides coordinated in the second binding site of the N-terminal domain of CaM

Magnetic susceptibility anisotropy tensors **calculated from the PCSs of the N-terminal domain**

|              | $\Delta\chi_{ax}$<br>( $10^{-32}$ m <sup>3</sup> ) | $\Delta\chi_{rh}$<br>( $10^{-32}$ m <sup>3</sup> ) | Euler angles (radians) <sup>a</sup> |              |             | Q-factor    |
|--------------|----------------------------------------------------|----------------------------------------------------|-------------------------------------|--------------|-------------|-------------|
| <b>298 K</b> |                                                    |                                                    |                                     |              |             |             |
| Tb           | 36 ± 1                                             | -16.5 ± 0.9                                        | 1.77 ± 0.04                         | -0.88 ± 0.05 | 0.71 ± 0.04 | <u>0.20</u> |
| Tm           | 31 ± 3                                             | -9 ± 1                                             | 0.48 ± 0.04                         | -0.51 ± 0.11 | 1.81 ± 0.04 | <u>0.17</u> |
| Dy           | 36 ± 1                                             | -13 ± 2                                            | 1.32 ± 0.07                         | -0.72 ± 0.11 | 0.31 ± 0.02 | <u>0.35</u> |
| <b>278 K</b> |                                                    |                                                    |                                     |              |             |             |
| Tb           | 47 ± 1                                             | -17 ± 3                                            | -1.29 ± 0.03                        | -1.48 ± 0.05 | 2.59 ± 0.03 | <u>0.12</u> |
| Tm           | 31 ± 2                                             | -10 ± 1                                            | -2.64 ± 0.03                        | -2.51 ± 0.07 | 1.30 ± 0.02 | <u>0.11</u> |
| Dy           | 54 ± 2                                             | -16 ± 2                                            | 2.02 ± 0.02                         | 1.60 ± 0.04  | 0.43 ± 0.02 | <u>0.13</u> |

Average tensors **calculated from the RDCs of the C-terminal domain**

|              | $\Delta\bar{\chi}_{ax}$<br>( $10^{-32}$ m <sup>3</sup> ) | $\Delta\bar{\chi}_{rh}$<br>( $10^{-32}$ m <sup>3</sup> ) | Euler angles (radians) <sup>b</sup> |              |             |
|--------------|----------------------------------------------------------|----------------------------------------------------------|-------------------------------------|--------------|-------------|
| <b>298 K</b> |                                                          |                                                          |                                     |              |             |
| Tb           | -2.7 ± 0.1                                               | 1.3 ± 0.1                                                | 2.81 ± 0.01                         | -2.11 ± 0.02 | 1.60 ± 0.03 |
| Tm           | 1.7 ± 0.1                                                | -0.8 ± 0.1                                               | 2.85 ± 0.05                         | -2.50 ± 0.08 | 1.33 ± 0.04 |
| Dy           | 2.2 ± 0.1                                                | -1.4 ± 0.1                                               | 1.10 ± 0.03                         | -1.64 ± 0.05 | 0.92 ± 0.06 |
| <b>278 K</b> |                                                          |                                                          |                                     |              |             |
| Tb           | -2.9 ± 0.3                                               | 1.6 ± 0.3                                                | 2.73 ± 0.08                         | -2.84 ± 0.08 | 1.86 ± 0.04 |
| Tm           | 2.9 ± 0.2                                                | -0.3 ± 0.2                                               | -0.56 ± 0.07                        | 0.11 ± 0.04  | 1.80 ± 0.22 |
| Dy           | 4.2 ± 0.4                                                | -2.0 ± 0.5                                               | 0.72 ± 0.12                         | 0.86 ± 0.06  | 0.49 ± 0.07 |

<sup>a</sup> with respect to structure 1J7O

<sup>b</sup> with respect to structure 1J7P

Figure S1. Pre-PREs observed in the presence of a gadolinium(III) ion in the second binding loop of the N-terminal domain of N60D CaM, for CaM residues in the C-terminal domain at 298 (A) and 278 (B) K.

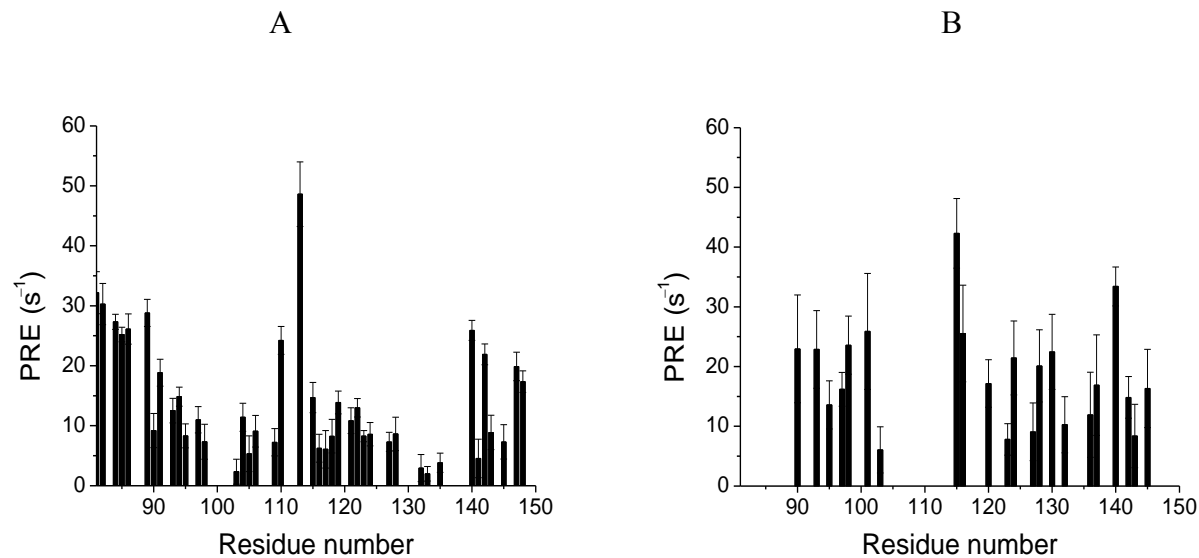

Figure S2. Agreement between the experimental pre-PRE (A), pes-PCS (B) and rdc-RDC (C) values of backbone amide protons at 298 K (A,B,C) and 278 K (D,E,F) and the averaged values calculated from the best fit families of conformations ~~calculated from the all sets of data~~. PRE-derived distances have been calculated using an effective correlation time of 6 and 10 ns at 298 and 279 K, respectively.

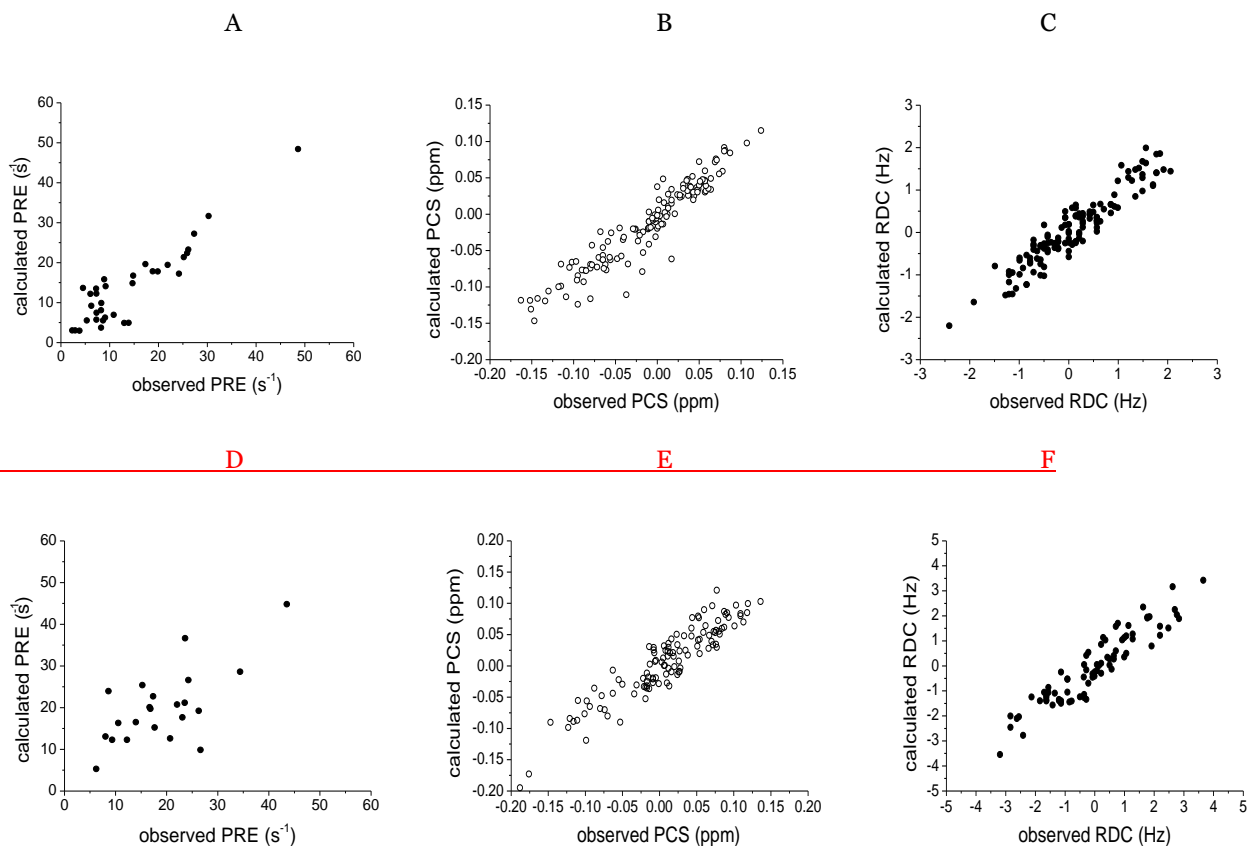

Figure S3. MO calculated in the slow exchange limit (range 0-1) at 298 K (A) and at 278 K (B) using PRE data only.

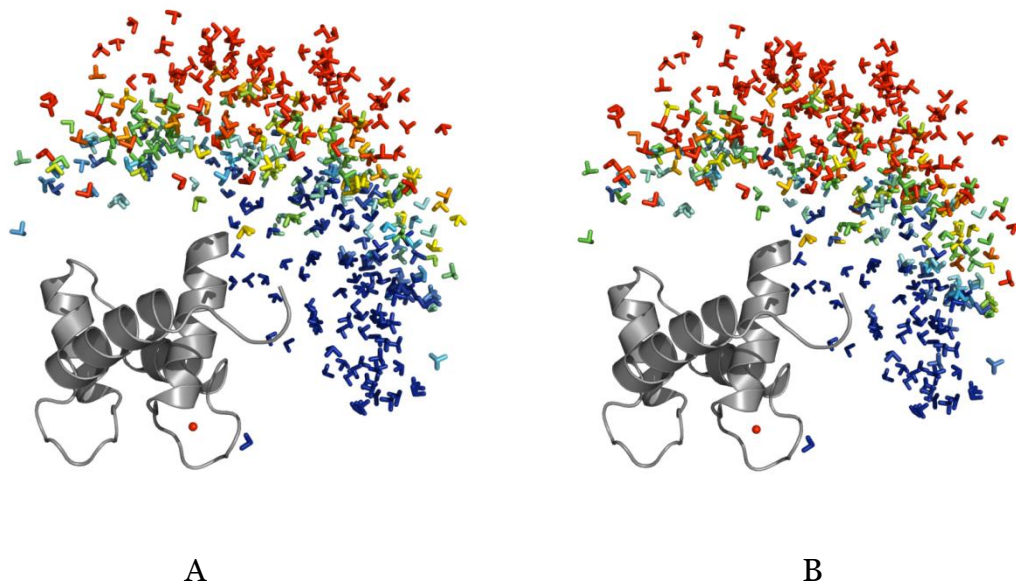

Figure S4. Observed versus calculated ~~pes~~-PCS values of backbone amide protons at 278 K of N-terminal domain nuclei for the three lanthanide-substituted CaM samples. Corresponding magnetic susceptibility anisotropy tensor parameters are reported in Table S1.

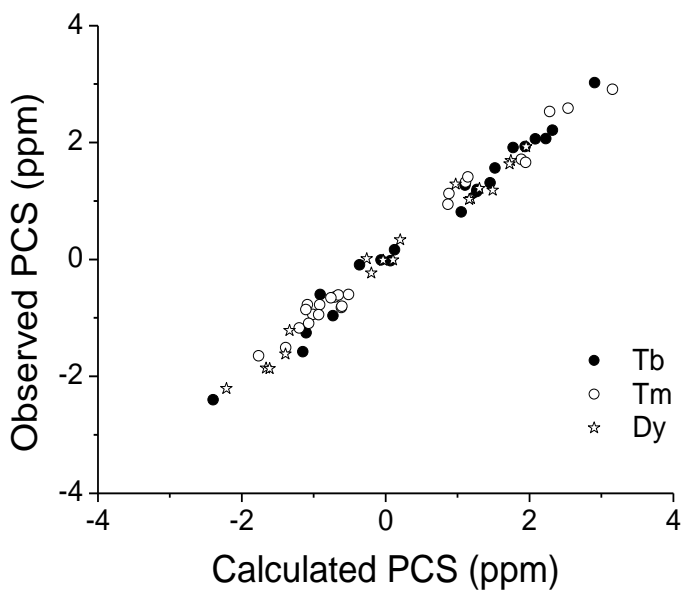



Figure S5. Observed versus calculated ~~rde~~-RDC values of C-terminal domain nuclei for the three lanthanide-substituted CaM samples at 278 K. The fit has been performed using the structure 1J7P. Corresponding average tensor parameters are reported in Table S1. Since the RDCs do not depend on the position of the metal ion, RDCs can in fact be fitted to the protein structure even in the presence on interdomain motion, and the resulting tensors are average tensors with magnitude reduced with respect to the paramagnetic susceptibility tensors.

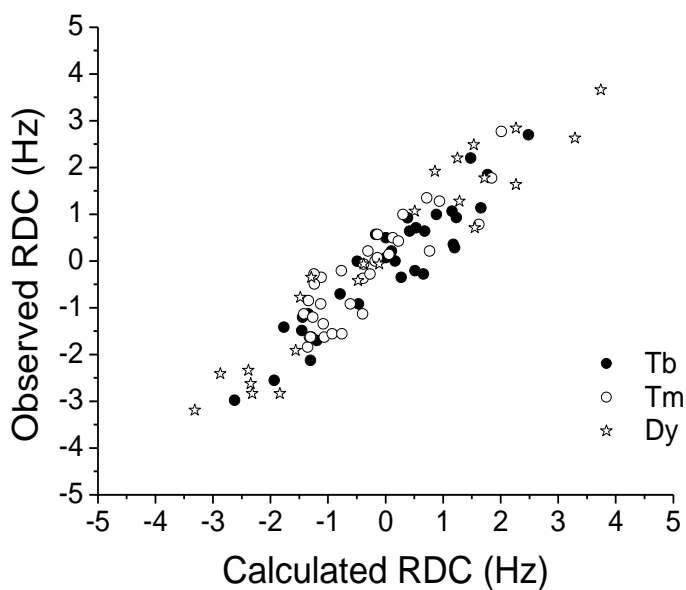

Figure S6. Comparison of the pes-PCS values of backbone amide protons for the three lanthanide metal ions substituted in the N-terminal domain of CaM at 278 K (red bars) and 298 K (empty bars).

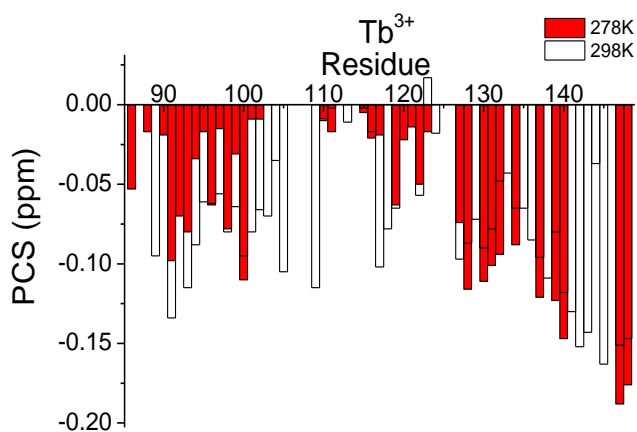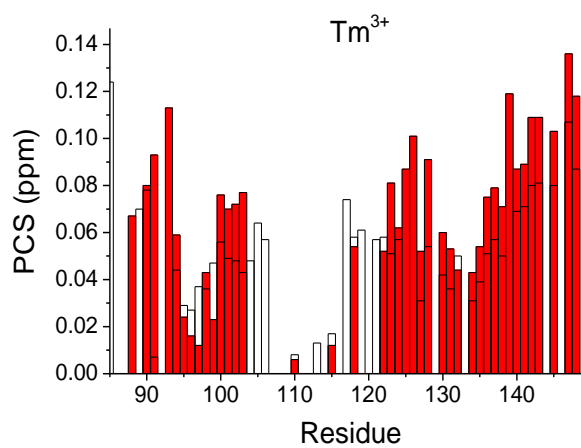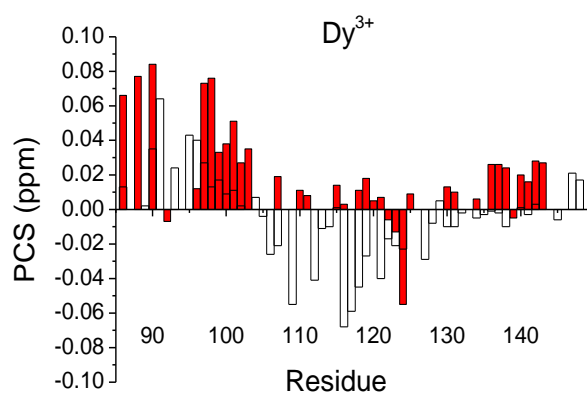

Table S2. Backbone amide proton Pes-PCS (in ppm) of N60D CaM ~~with-measured when~~ Tb<sup>3+</sup>, Tm<sup>3+</sup> or Dy<sup>3+</sup> ions are substituted to the calcium(II) ion in the second binding site of the N-terminal domain, at 278 K.

| Residue Number | Tb     | Tm     | Dy     |
|----------------|--------|--------|--------|
| 2              | -      | -0.705 | -      |
| 3              | 0.81   | -1.087 | -      |
| 4              | -      | -1.01  | 1.691  |
| 5              | 1.16   | -0.613 | 1.213  |
| 6              | 1.31   | -0.606 | 1.183  |
| 7              | 1.196  | -      | 1.038  |
| 8              | 1.27   | -0.655 | -      |
| 9              | 1.928  | -      | 1.633  |
| 10             | 2.065  | -1.199 | -      |
| 11             | 1.565  | -0.914 | 1.06   |
| 12             | 1.914  | -1.108 | 1.288  |
| 13             | 3.024  | -1.387 | 1.926  |
| 14             | 2.061  | -1.068 | 1.026  |
| 15             | -      | -0.76  | -      |
| 16             | -      | -      | 0.333  |
| 17             | 2.211  | -      | -      |
| 18             | -      | -0.512 | -      |
| 19             | 0.166  | -      | -      |
| 21             | -      | -      | -2.21  |
| 22             | -0.603 | -0.93  | -      |
| 23             | -      | -1.763 | -      |
| 25             | -      | -      | -0.013 |
| 26             | -0.026 | -      | -      |
| 29             | -      | -      | -0.017 |
| 31             | -      | 1.112  | -      |
| 33             | -      | 3.157  | -      |
| 34             | -      | 1.887  | -      |
| 35             | -      | 1.947  | -      |
| 36             | -2.403 | 2.282  | -      |
| 38             | -1.581 | -      | -1.861 |
| 40             | -      | 0.881  | -1.618 |
| 41             | -      | -      | -1.868 |
| 42             | -1.256 | 1.147  | -      |
| 44             | -0.964 | -      | 0.009  |
| 45             | -      | 0.868  | -      |
| 48             | -0.093 | -      | -      |
| 49             | -      | 2.539  | -      |

| Residue Number | Tb     | Tm     | Dy     |
|----------------|--------|--------|--------|
| 51             | -      | -      | -0.236 |
| 60             | -0.01  | -      | -      |
| 83             | -      | -      | -0.099 |
| 86             | -0.053 | -      | 0.066  |
| 88             | -0.017 | 0.067  | 0.077  |
| 90             | -0.019 | 0.08   | 0.084  |
| 91             | -0.098 | 0.093  | -      |
| 92             | -0.07  | -      | -0.007 |
| 93             | -0.08  | 0.113  | -      |
| 94             | -0.034 | 0.059  | -      |
| 95             | -0.017 | 0.024  | -      |
| 96             | -0.063 | 0.016  | 0.012  |
| 97             | -0.015 | 0.012  | 0.073  |
| 98             | -0.078 | 0.043  | 0.076  |
| 99             | -0.031 | 0.023  | 0.033  |
| 100            | -0.11  | 0.076  | 0.038  |
| 101            | -0.009 | 0.07   | 0.051  |
| 102            | -0.009 | 0.072  | 0.027  |
| 103            | -      | 0.077  | 0.035  |
| 107            | -      | -      | 0.019  |
| 110            | -0.009 | 0.006  | 0.011  |
| 111            | -0.017 | -0.008 | 0.008  |
| 113            | -      | -0.001 | -      |
| 115            | -0.005 | 0.012  | 0.014  |
| 116            | -0.021 | -0.008 | 0.003  |
| 117            | -0.019 | -      | -      |
| 118            | -      | 0.054  | 0.011  |
| 119            | -0.063 | -      | 0.018  |
| 120            | -0.022 | -0.014 | 0.005  |
| 121            | -0.014 | -      | 0.007  |
| 122            | -0.05  | 0.052  | -0.006 |
| 123            | -0.017 | 0.081  | -0.013 |
| 124            | -      | 0.062  | -0.055 |
| 125            | -      | 0.087  | 0.009  |
| 126            | -      | 0.101  | -      |
| 127            | -0.074 | 0.052  | -      |
| 128            | -0.116 | 0.091  | -      |
| 130            | -0.111 | 0.06   | 0.013  |

| Residue Number | Tb     | Tm    | Dy     |
|----------------|--------|-------|--------|
| 131            | -0.101 | 0.053 | 0.01   |
| 132            | -0.094 | 0.044 | -      |
| 134            | -0.088 | 0.043 | 0.006  |
| 135            | -      | 0.054 | -      |
| 136            | -      | 0.075 | 0.026  |
| 137            | -0.121 | 0.079 | 0.026  |
| 138            | -      | 0.071 | 0.024  |
| 139            | -0.123 | 0.119 | -0.005 |
| 140            | -0.147 | 0.087 | 0.02   |
| 141            | -      | 0.089 | 0.016  |
| 142            | -      | 0.109 | 0.028  |
| 143            | -      | 0.109 | 0.027  |
| 145            | -      | 0.103 | -      |
| 147            | -0.188 | 0.136 | -      |
| 148            | -0.176 | 0.118 | -      |

Table S3.  $N\text{-}^1\text{H}$  Rdc-RDC (in Hz) of N60D CaM with Tb<sup>3+</sup>, Tm<sup>3+</sup> or Dy<sup>3+</sup> substituted to calcium(II) in the second binding site of the N-terminal domain, at 278 K and 700 MHz.

| C-terminal domain RDC |        |        |        |
|-----------------------|--------|--------|--------|
| Residue Number        | Tb     | Tm     | Dy     |
| 88                    | -      | 0.497  | -      |
| 90                    | -1.135 | 0.78   | -      |
| 91                    | 0.639  | 0      | -      |
| 92                    | -0.007 | -      | -      |
| 93                    | -2.554 | 2.767  | -      |
| 94                    | -      | 1.277  | -      |
| 95                    | 1.135  | 0.425  | -      |
| 96                    | 0.497  | -1.845 | -2.838 |
| 97                    | -      | -0.372 | -      |
| 98                    | 0.355  | -1.348 | 3.657  |
| 99                    | -      | -0.355 | -      |
| 100                   | 2.199  | -1.632 | 2.199  |
| 101                   | -      | 0.213  | 1.064  |
| 102                   | 0.709  | -1.135 | 1.774  |
| 103                   | -      | -0.497 | 1.916  |
| 106                   | -      | -0.213 | -      |
| 110                   | -      | -1.135 | -      |
| 113                   | -      | -0.284 | -      |
| 115                   | 0.639  | -      | -2.838 |
| 116                   | -0.213 | 0.142  | -3.193 |
| 118                   | -      | -      | 0.71   |
| 119                   | -1.419 | -      | 2.838  |
| 121                   | -1.206 | -      | 1.277  |
| 122                   | -      | 0.992  | -      |
| 123                   | -2.129 | -1.561 | -      |
| 125                   | -      | -      | 2.483  |
| 127                   | -0.922 | -1.206 | -      |
| 128                   | -1.703 | -0.071 | -      |
| 129                   | -      | 0.213  | -      |
| 130                   | 0.071  | 1.774  | -0.78  |
| 131                   | 1.845  | 0.568  | 1.632  |
| 132                   | -0.355 | 0.071  | -      |
| 134                   | 0.284  | -1.561 | -0.071 |
| 135                   | 0.213  | -0.851 | -      |
| 136                   | 1.064  | -1.632 | 2.625  |
| 137                   | 2.696  | -0.922 | -      |
| 140                   | 0.926  | -0.919 | -2.625 |
| 141                   | 0.993  | -1.632 | -2.412 |
| 143                   | -0.284 | -1.632 | -0.355 |
| 145                   | -0.284 | -      | -      |

Table S4. Amide proton  $T_2$ - $R_2$  pre-PRE (in  $s^{-1}$ ) of N60D CaM with  $Gd^{3+}$  substituted to calcium(II) in the second binding site of the N-terminal domain, at 278 K and 298 K (500 MHz).

| Residue Number | 298K  | 278K  |
|----------------|-------|-------|
| 4              | 40.90 | -     |
| 5              | 47.88 | -     |
| 6              | 49.32 | 59.25 |
| 9              | 40.07 | -     |
| 10             | 65.60 | -     |
| 35             | 42.50 | -     |
| 39             | 33.77 | -     |
| 40             | 53.31 | -     |
| 41             | 22.74 | -     |
| 42             | 54.04 | 68.3  |
| 44             | 54.36 | 72.7  |
| 45             | 63.81 | -     |
| 77             | -     | 57.57 |
| 78             | -     | 40.74 |
| 83             | 30.28 | -     |
| 84             | 27.32 | -     |
| 85             | 25.20 | -     |
| 86             | 26.11 | -     |
| 90             | 9.18  | 22.95 |
| 91             | 18.83 | -     |
| 93             | -     | 22.87 |
| 94             | 14.84 | -     |
| 95             | 8.31  | 13.57 |
| 97             | -     | 16.19 |
| 98             | 7.31  | 23.57 |
| 101            | -     | 25.88 |
| 103            | 2.33  | 6.05  |
| 105            | 5.32  | -     |
| 106            | 9.07  | -     |
| 109            | 7.23  | -     |
| 110            | 24.21 | -     |
| 113            | 48.60 | -     |
| 115            | 14.70 | 42.30 |
| 116            | 6.25  | 25.54 |
| 117            | 6.07  | -     |
| 118            | 8.25  | -     |

| Residue Number | 298K  | 278K  |
|----------------|-------|-------|
| 120            | -     | 17.16 |
| 121            | 10.83 | -     |
| 122            | 12.98 | -     |
| 123            | 8.26  | 7.80  |
| 124            | -     | 21.44 |
| 127            | 7.30  | 9.07  |
| 128            | 8.64  | 20.10 |
| 130            | -     | 22.44 |
| 132            | 2.94  | 10.25 |
| 135            | 3.82  | -     |
| 136            | -     | 11.91 |
| 137            | -     | 16.88 |
| 140            | 25.90 | 33.41 |
| 141            | 4.53  | -     |
| 142            | 21.89 | 14.83 |
| 143            | 8.87  | 8.37  |
| 145            | 7.30  | 16.34 |
| 147            | 19.87 | -     |
| 148            | 17.34 | -     |

|     |       |   |
|-----|-------|---|
| 119 | 13.88 | - |
|-----|-------|---|

|  |
|--|
|  |
|--|
